# Supplementary material for: Transcriptome-Wide Analysis of Nitrogen-Regulated Genes in Tea Plant (Camellia sinensis L. O. Kuntze) and Characterization of Amino Acid Transporter CsCAT9.1
Source: MDPI journal article supplement (doi:10.3390/plants9091218), 2020-09-17
Supplement: s1 [file Supplementary Figure S3.pdf › plants-912709-supple-0/20200810Supplementary materials/Supplementary Figure S1-11/Supplementary Figure S3.pdf]

## Species Distribution

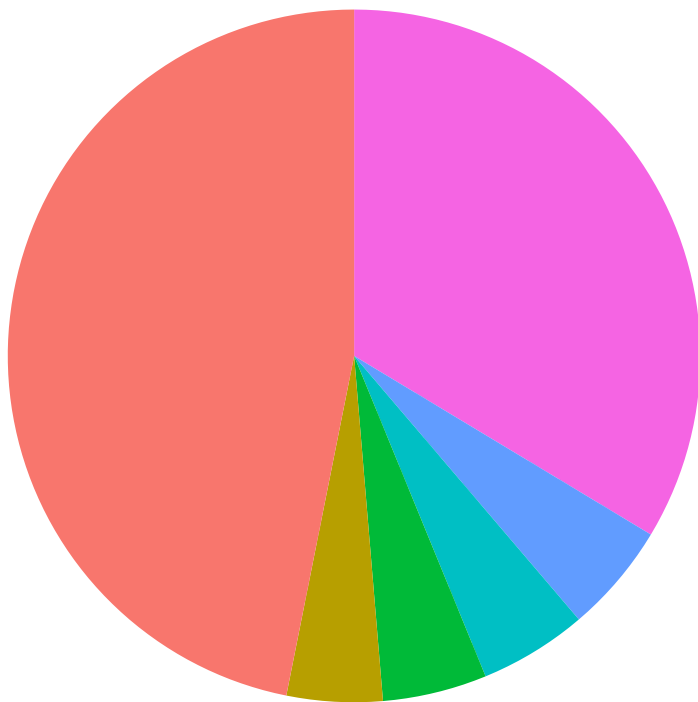

### Species

- Vitis vinifera(33.62%)
- Coffea canephora(5.14%)
- Sesamum indicum(5.04%)
- Theobroma cacao(4.87%)
- Nelumbo nucifera(4.47%)
- others(46.86%)
