# Supplementary figures and images for: Transcriptome-Wide Analysis of Nitrogen-Regulated Genes in Tea Plant (Camellia sinensis L. O. Kuntze) and Characterization of Amino Acid Transporter CsCAT9.1
Source: MDPI journal article supplement (doi:10.3390/plants9091218), 2020-09-17

Histogram for Length Distribution

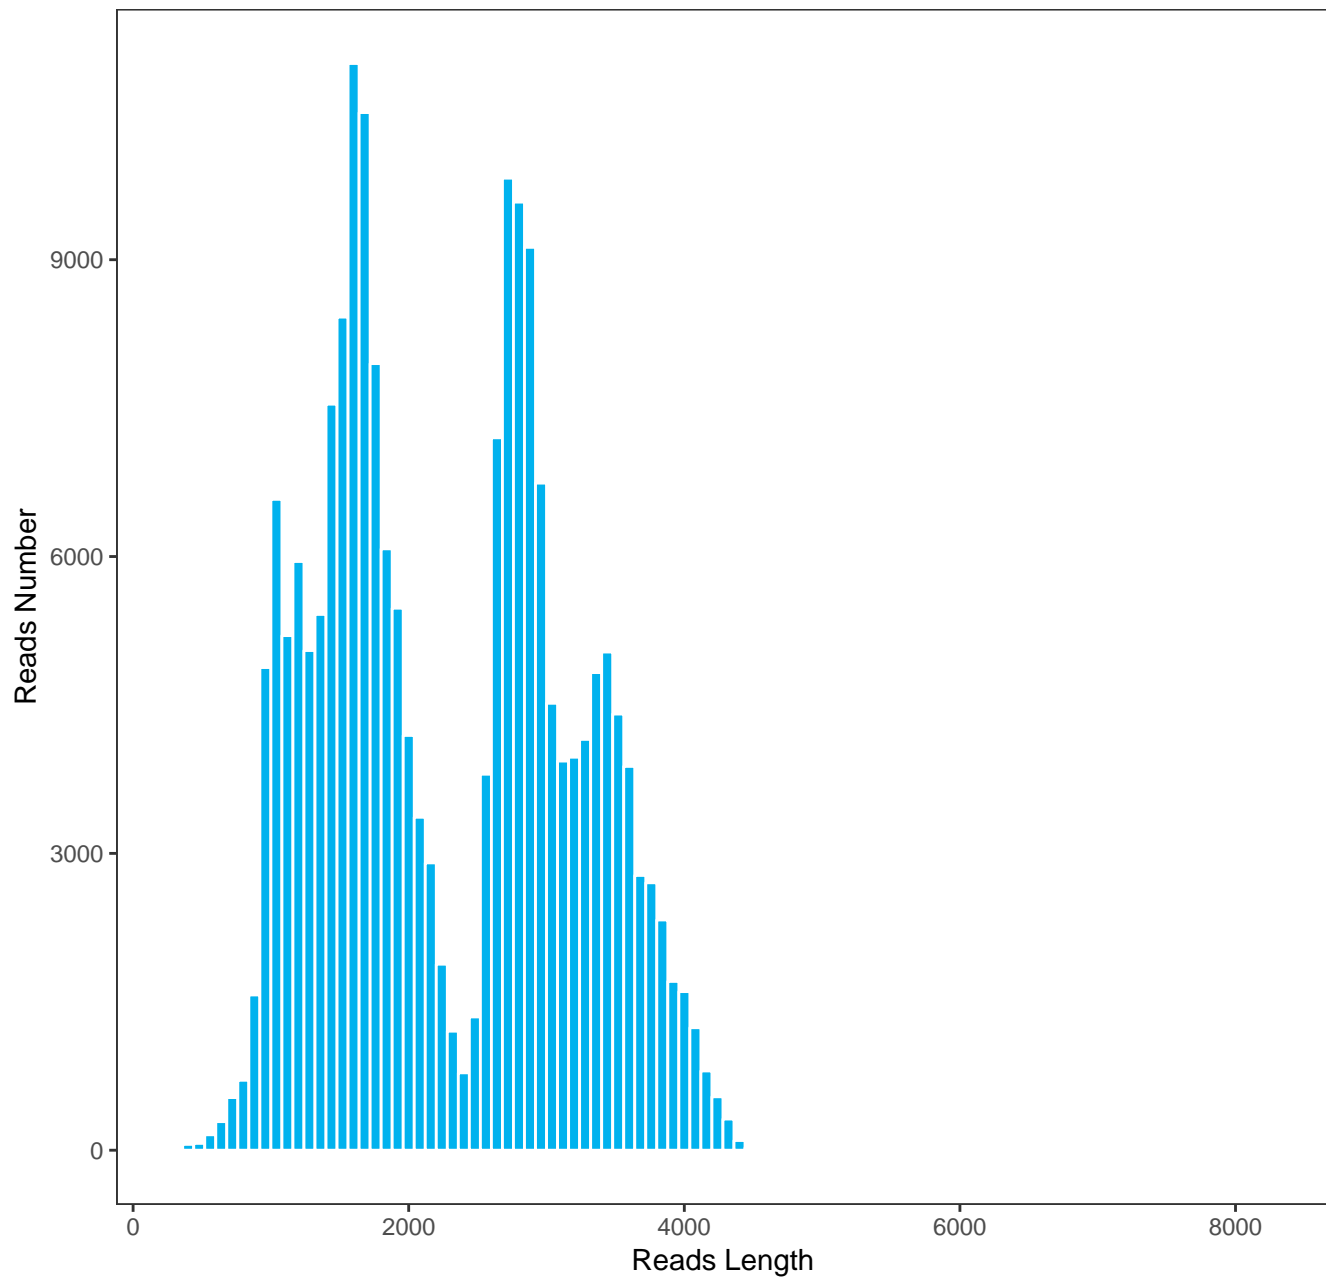

Supplement: s1 [file Supplementary Figure S1.pdf › plants-912709-supple-0/20200810Supplementary materials/Supplementary Figure S1-11/Supplementary Figure S1.pdf]

Histogram for Length Distribution

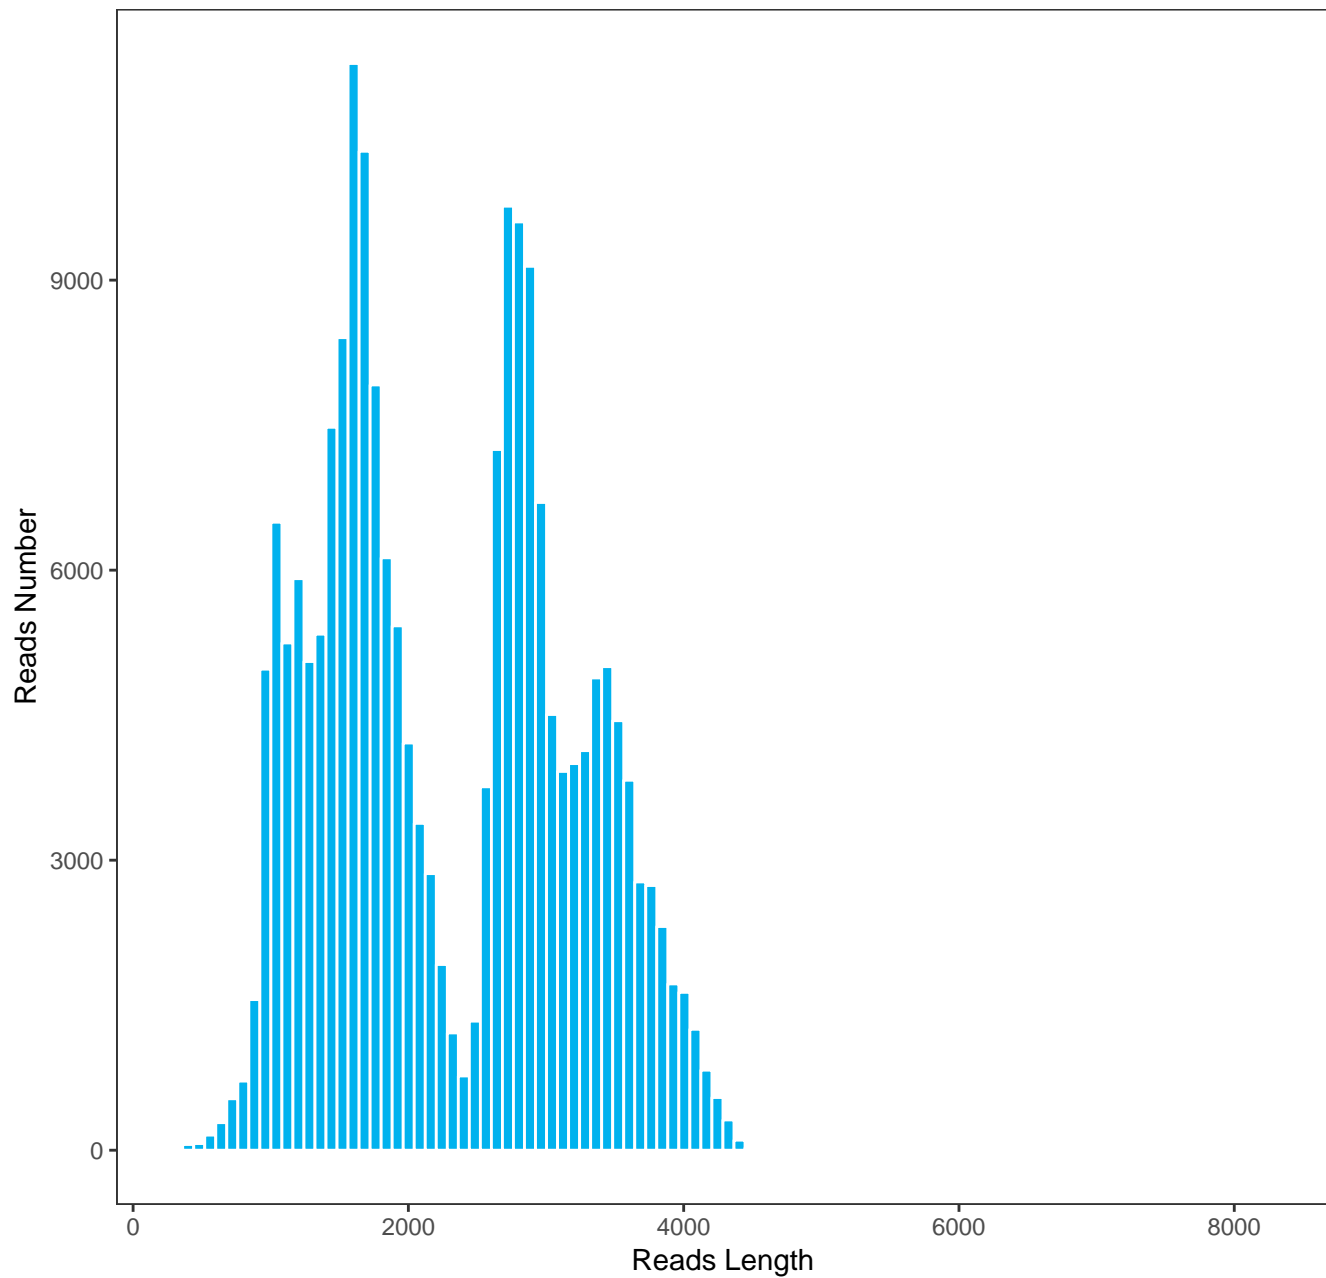

Supplement: s1 [file Supplementary Figure S2.pdf › plants-912709-supple-0/20200810Supplementary materials/Supplementary Figure S1-11/Supplementary Figure S2.pdf]

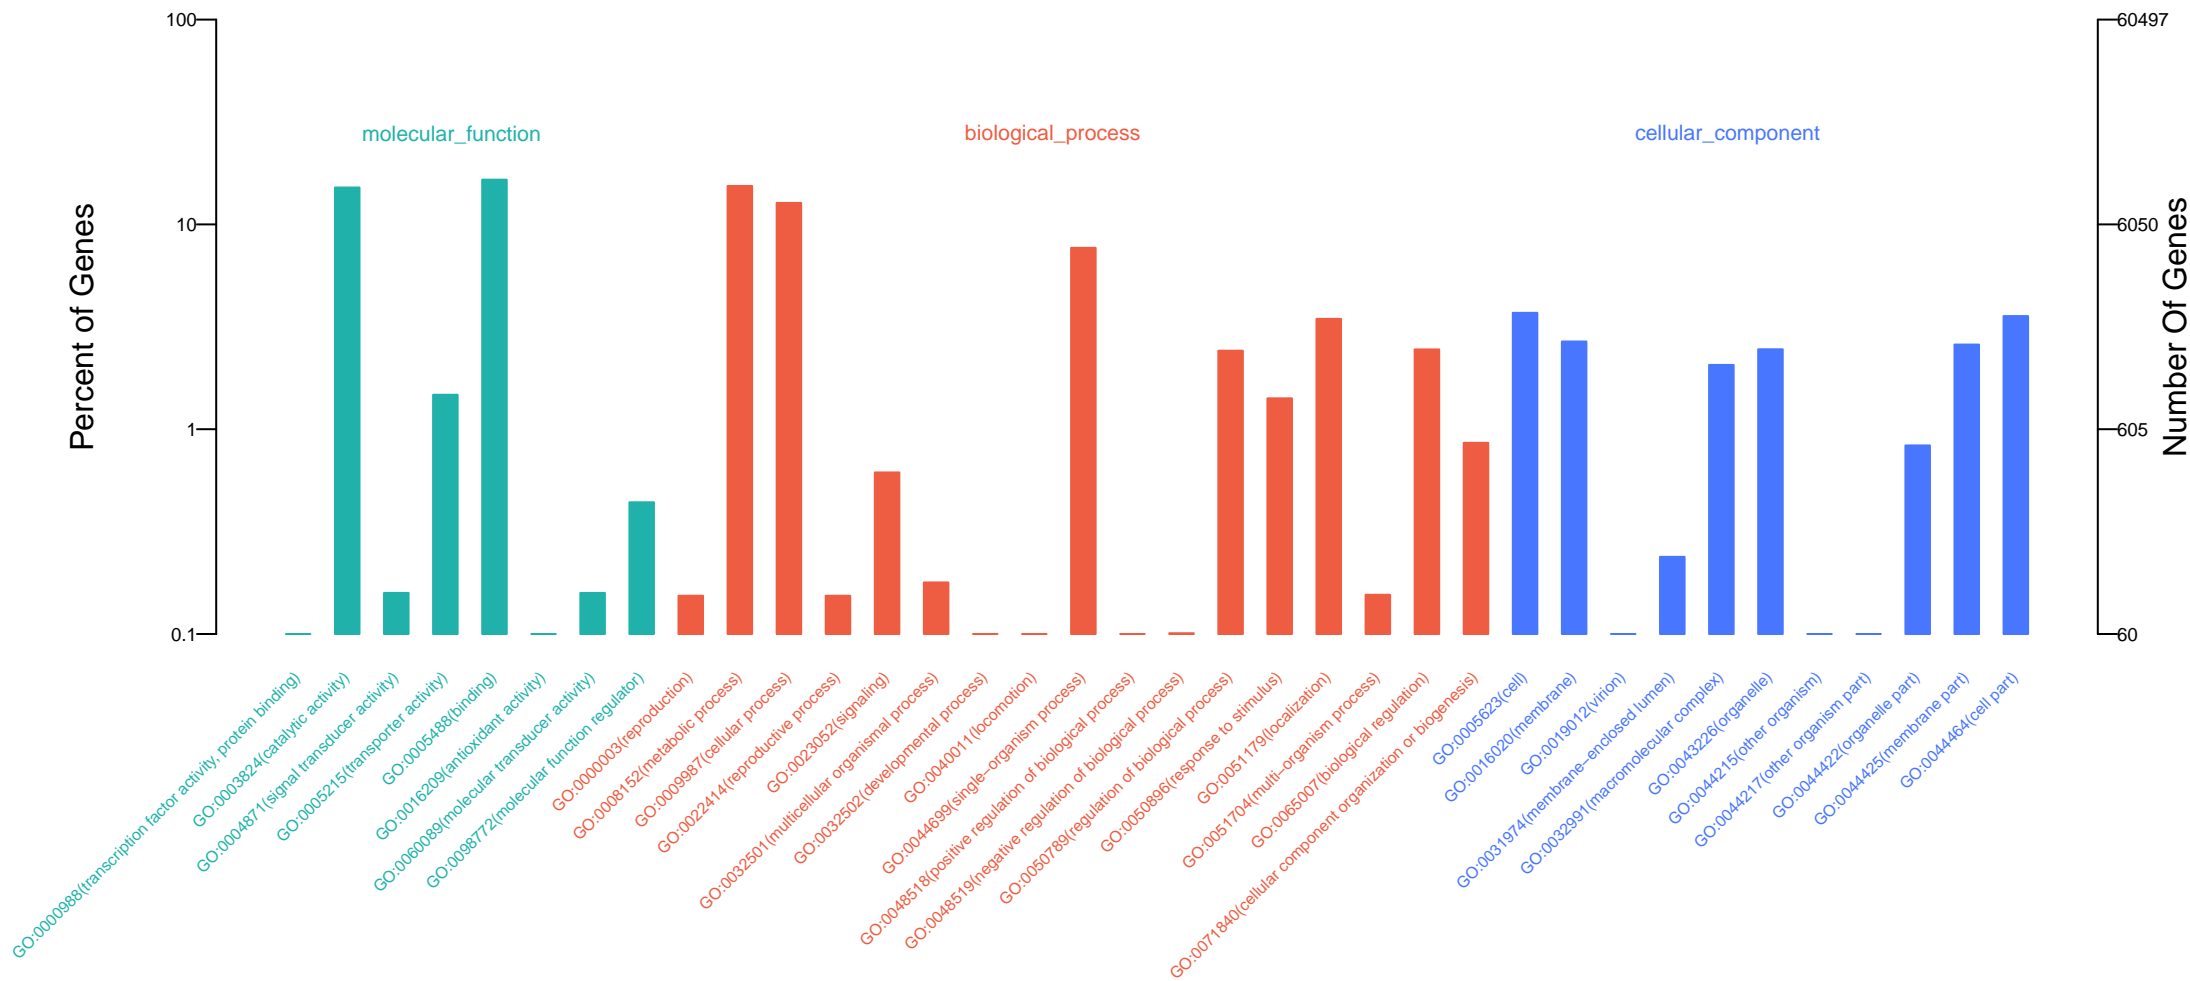

Supplement: s1 [file Supplementary Figure S4.pdf › plants-912709-supple-0/20200810Supplementary materials/Supplementary Figure S1-11/Supplementary Figure S4.pdf]

# KOG Function Classification

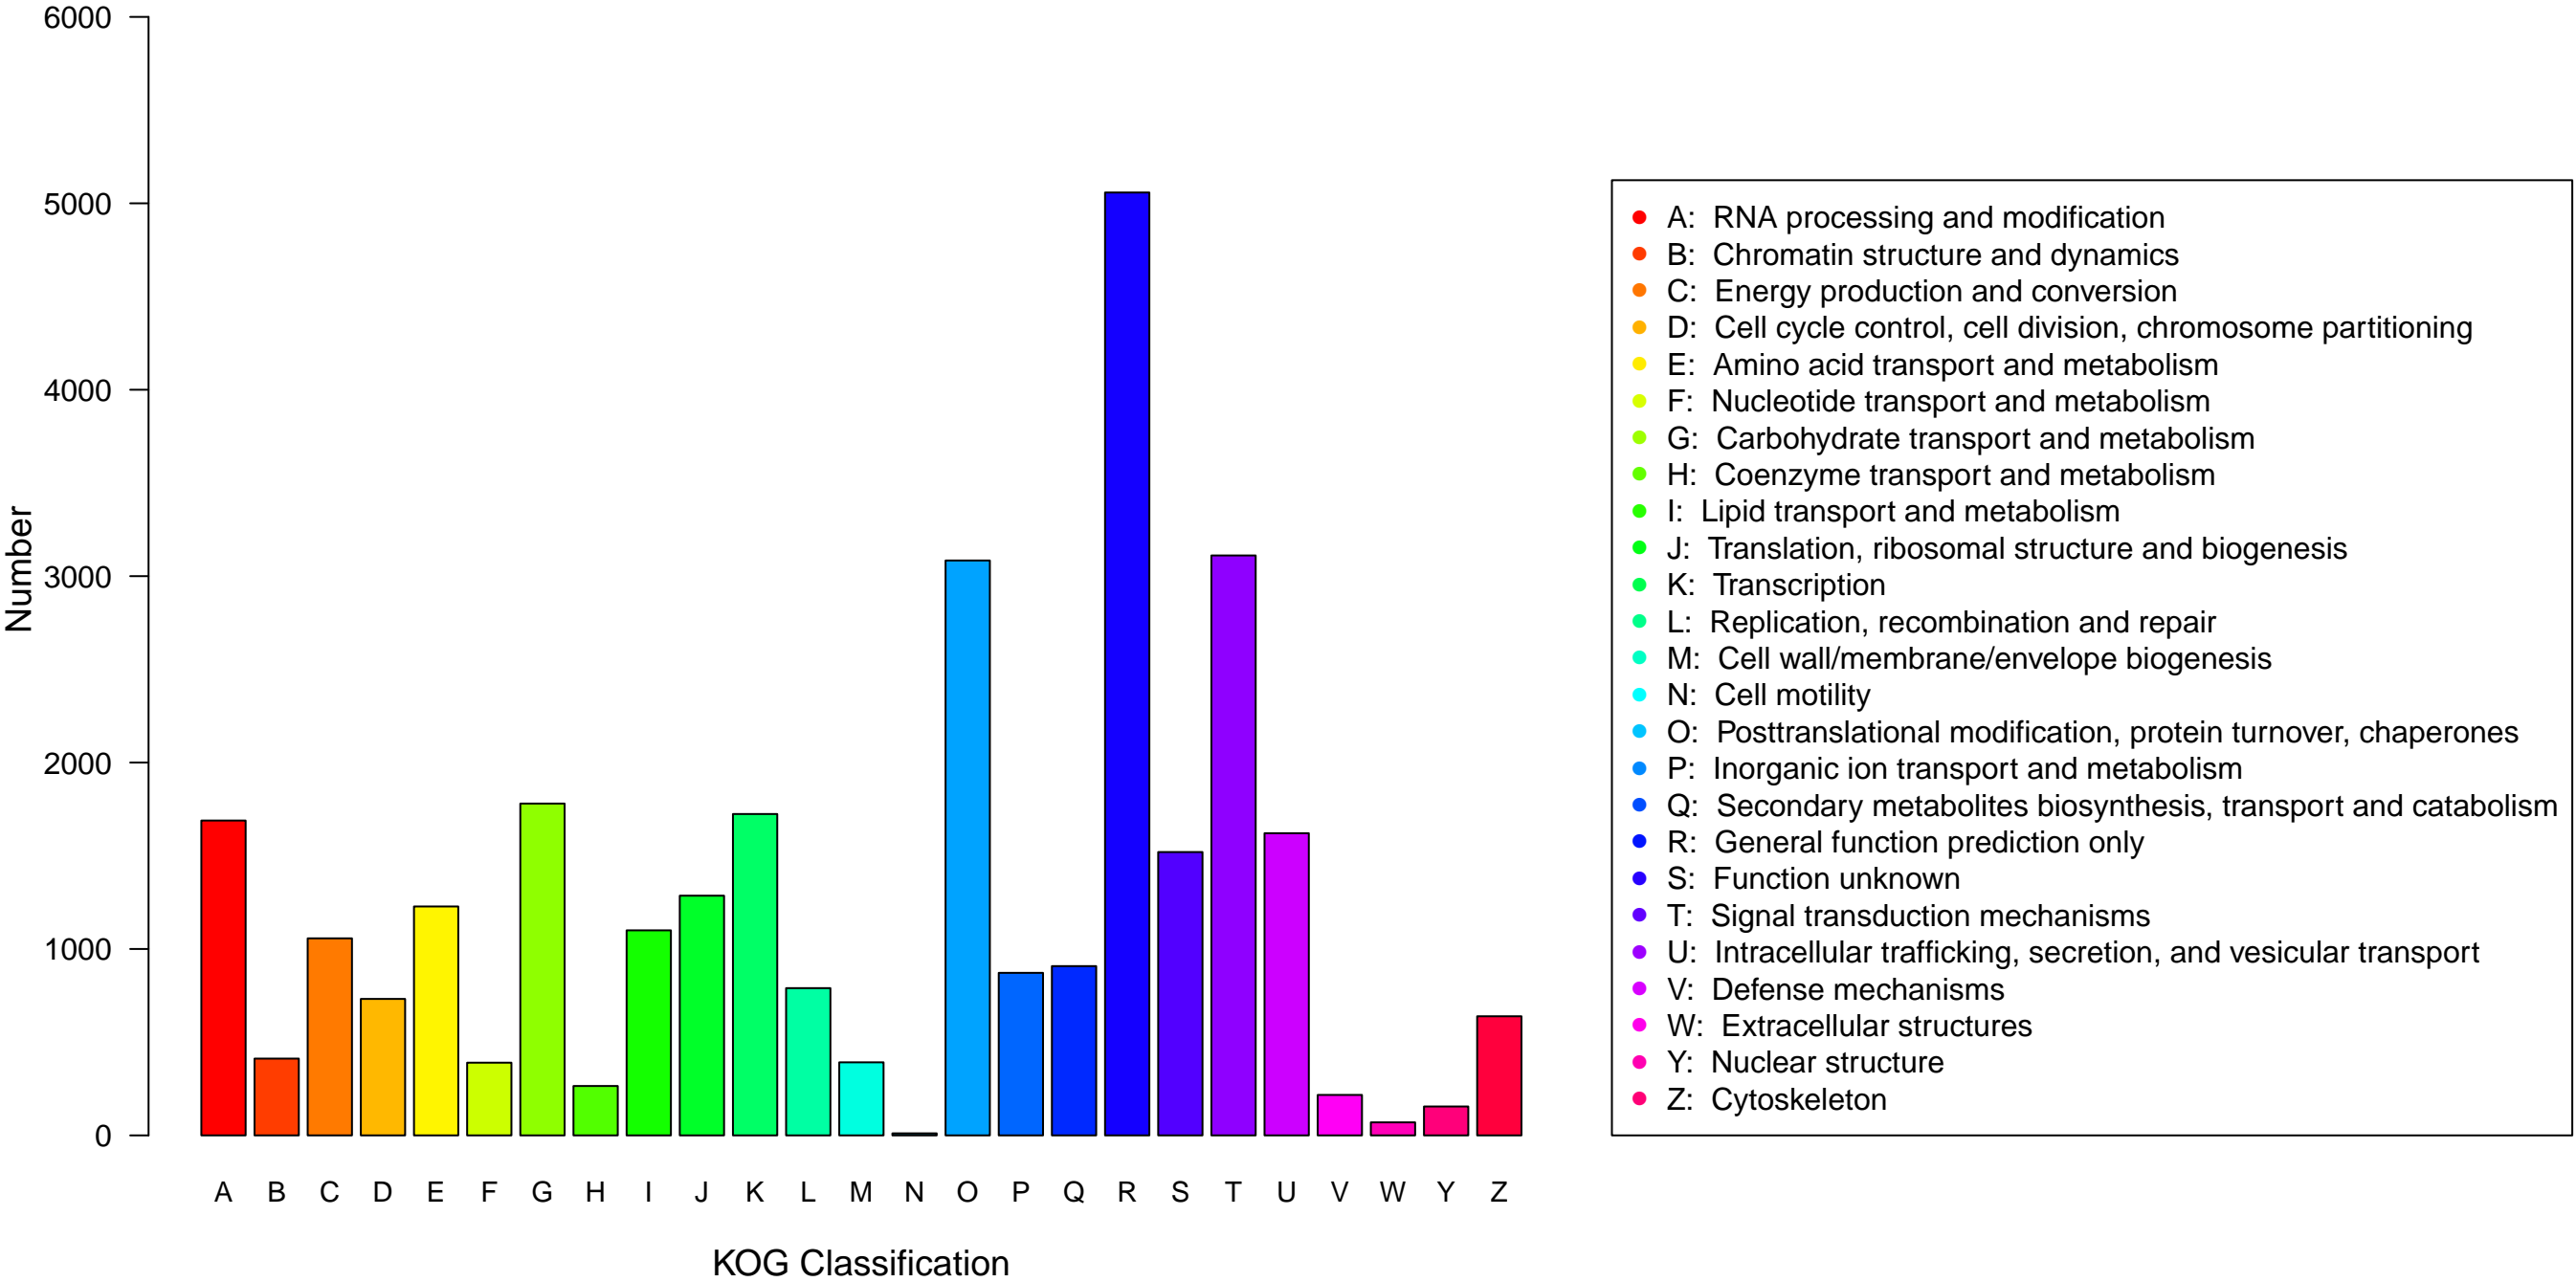

Supplement: s1 [file Supplementary Figure S5.pdf › plants-912709-supple-0/20200810Supplementary materials/Supplementary Figure S1-11/Supplementary Figure S5.pdf]

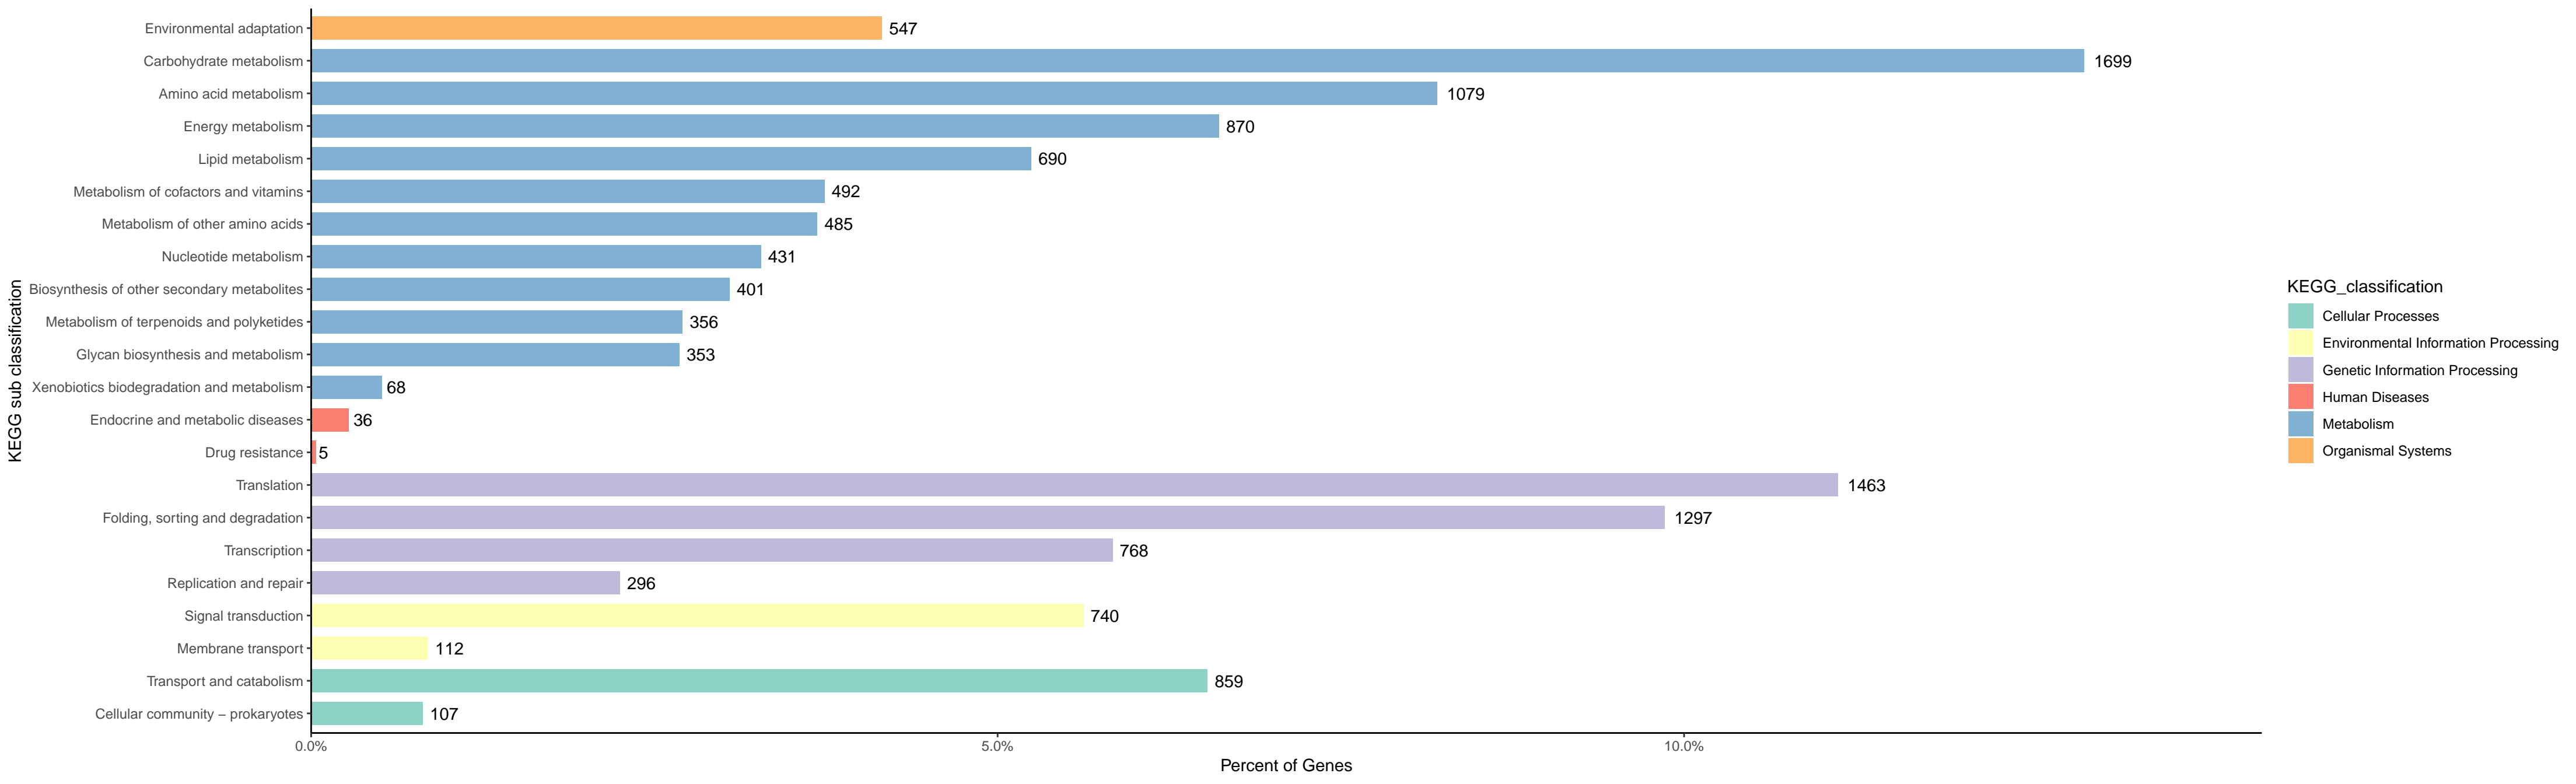

Supplement: s1 [file Supplementary Figure S6.pdf › plants-912709-supple-0/20200810Supplementary materials/Supplementary Figure S1-11/Supplementary Figure S6.pdf]
